# Supplementary material
Source: PubMed Central journal article supplement (PMC4262441)
Supplement: supp_kwu285_kwu285supp.pdf [file supp_kwu285_kwu285supp.pdf]

**Web Table 1.** Geometric Mean Comparison of Benzophenone-Type UV Filter Concentration by Body Mass Index and Partner, LIFE Study, 2005-2009.

| Chemical<br>(ng/mL) | Female BMI (n=454) |                                   |                                  |                                | Male BMI (n=439) |                                |                                |                                |
|---------------------|--------------------|-----------------------------------|----------------------------------|--------------------------------|------------------|--------------------------------|--------------------------------|--------------------------------|
|                     | %<br><LOD          | <24.9<br>Mean (95% CI)            | 25.0-29.9<br>Mean (95% CI)       | ≥30.0<br>Mean (95% CI)         | %<br><LOD        | <24.9<br>Mean (95% CI)         | 25.0-29.9<br>Mean (95% CI)     | ≥30.0<br>Mean (95% CI)         |
| BP-1                | <1                 | 7.04 (5.29, 9.35) <sup>a</sup>    | 4.89 (3.30, 7.25) <sup>a</sup>   | 2.28 (1.57, 3.30) <sup>a</sup> | 1                | 3.67 (2.28, 5.92) <sup>a</sup> | 1.73 (1.25, 2.41) <sup>a</sup> | 1.24 (0.90, 1.71) <sup>a</sup> |
| BP-2                | 28                 | 0.10 (0.08, 0.12)                 | 0.10 (0.07, 0.13)                | 0.09 (0.07, 0.11)              | 28               | 0.05 (0.04, 0.07)              | 0.05 (0.04, 0.06)              | 0.05 (0.04, 0.07)              |
| BP-3                | <1                 | 13.49 (10.01, 18.16) <sup>a</sup> | 11.00 (7.37, 16.42) <sup>a</sup> | 5.32 (3.54, 7.99) <sup>a</sup> | 2                | 6.14 (3.73, 10.11)             | 4.47 (3.23, 6.18)              | 2.96 (2.18, 4.02)              |
| BP-8                | 29                 | 0.29 (0.19, 0.44)                 | 0.28 (0.17, 0.46)                | 0.16 (0.10, 0.25)              | 27               | 0.14 (0.07, 0.29)              | 0.12 (0.08, 0.19)              | 0.11 (0.07, 0.16)              |
| 4OH-BP              | 6                  | 0.21 (0.18, 0.24)                 | 0.24 (0.19, 0.31)                | 0.19 (0.15, 0.24)              | 4                | 0.12 (0.09, 0.16)              | 0.12 (0.10, 0.14)              | 0.14 (0.12, 0.16)              |

NOTE: All chemical concentrations are creatinine-adjusted.

BMI, denotes body mass index (weight in kg/ height in m<sup>2</sup>); CI, denotes confidence interval; LIFE, denotes Longitudinal Investigation of Fertility and the Environment Study; LOD, denotes limits of detection; uv, denotes ultra violet

2,4-OH-BP; 2,4-dihydroxybenzophenone or BP-1

2,2',4,4'-OH-BP; 2,2',4,4'-tetrahydroxybenzophenone or BP-2

2OH-4-MeO-BP; 2-hydroxy-4-methoxybenzophenone or BP-3

2,2'-OH-4MeO-BP; 2,2'-dihydroxy-4-methoxybenzophenone or BP-8

4OH-BP; 4-hydroxybenzophenone

<sup>a</sup>  $P < 0.05$ ; Wilcoxon test, when testing each partner separately.

**Web Table 2.** Geometric Mean Comparison of Benzophenone-Type UV Filter Concentrations by Serum Cotinine and Partner, LIFE Study, 2005-2009.

| Chemical<br>(ng/mL) | Female Concentration (n=454)     |                                      |                                  | Male Concentration (n=439)     |                                      |                                  |
|---------------------|----------------------------------|--------------------------------------|----------------------------------|--------------------------------|--------------------------------------|----------------------------------|
|                     | None<br>(<9.99 ng/mL)            | Passive Smoking<br>(10.0-99.9 ng/mL) | Active Smoking<br>(≥100.0 ng/mL) | None<br>(<9.99 ng/mL)          | Passive Smoking<br>(10.0-99.9 ng/mL) | Active Smoking<br>(≥100.0 ng/mL) |
|                     | Mean (95% CI)                    | Mean (95% CI)                        | Mean (95% CI)                    | Mean (95% CI)                  | Mean (95% CI)                        | Mean (95% CI)                    |
| BP-1                | 5.00 (4.03, 6.19) <sup>a</sup>   | 5.91 (2.53, 13.84) <sup>a</sup>      | 1.23 (0.62, 2.45) <sup>a</sup>   | 1.90 (1.50, 2.40) <sup>a</sup> | 2.73 (0.84, 8.95) <sup>a</sup>       | 0.88 (0.54, 1.46) <sup>a</sup>   |
| BP-2                | 0.09 (0.08, 0.10)                | 0.14 (0.07, 0.26)                    | 0.13 (0.07, 0.22)                | 0.05 (0.04, 0.05)              | 0.07 (0.04, 0.14)                    | 0.05 (0.04, 0.08)                |
| BP-3                | 10.70 (8.55, 13.38) <sup>a</sup> | 11.01 (4.49, 27.02) <sup>a</sup>     | 2.61 (1.27, 5.36) <sup>a</sup>   | 4.61 (3.66, 5.80) <sup>a</sup> | 5.02 (1.60, 15.72) <sup>a</sup>      | 1.85 (1.15, 2.96) <sup>a</sup>   |
| BP-8                | 0.25 (0.19, 0.34)                | 0.26 (0.10, 0.71)                    | 0.12 (0.06, 0.21)                | 0.13 (0.10, 0.17) <sup>a</sup> | 0.25 (0.07, 0.84) <sup>a</sup>       | 0.07 (0.04, 0.12) <sup>a</sup>   |
| 4OH-BP              | 0.21 (0.19, 0.24)                | 0.28 (0.17, 0.47)                    | 0.17 (0.11, 0.26)                | 0.13 (0.11, 0.14)              | 0.22 (0.10, 0.47)                    | 0.10 (0.07, 0.14)                |

NOTE: All chemical concentrations are creatinine-adjusted.

CI, denotes confidence interval; LIFE, denotes Longitudinal Investigation of Fertility and the Environment Study; LOD, denotes limits of detection; uv, denotes ultra violet

2,4-OH-BP; 2,4-dihydroxybenzophenone or BP-1

2,2',4,4'-OH-BP; 2,2',4,4'-tetrahydroxybenzophenone or BP-2

2OH-4-MeO-BP; 2-hydroxy-4-methoxybenzophenone or BP-3

2,2'OH-4MeO-BP; 2,2'-dihydroxy-4-methoxybenzophenone or BP-8

4OH-BP; 4-hydroxybenzophenone

<sup>a</sup>  $P < 0.05$ ; Wilcoxon test, when testing each partner separately.

**Web Table 3.** Geometric Mean Comparison of Female Partners' Benzophenone-Type UV Filter Concentrations by Season, LIFE Study, 2005-2009.

| UV Filter           | Total (n=501)<br>Geometric Mean (95% CI) | Winter (n = 131)<br>Geometric Mean (95% CI) | Spring (n = 151)<br>Geometric Mean (95% CI) | Summer (n = 110)<br>Geometric Mean (95% CI) | Fall (n=109)<br>Geometric Mean (95% CI) |
|---------------------|------------------------------------------|---------------------------------------------|---------------------------------------------|---------------------------------------------|-----------------------------------------|
| BP1 <sup>a</sup>    | 4.62 (3.78, 5.64)<br>[408]               | 2.23 (1.44, 3.45)<br>[90]                   | 3.55 (2.54, 4.96)<br>[142]                  | 12.00 (8.16, 17.63)<br>[100]                | 5.07 (3.38, 7.61)<br>[76]               |
| BP2 <sup>b</sup>    | 0.09 (0.08, 0.11)<br>[381]               | 0.08 (0.06, 0.11)<br>[88]                   | 0.07 (0.06, 0.09)<br>[133]                  | 0.15 (0.11, 0.20)<br>[90]                   | 0.12 (0.09, 0.16)<br>[70]               |
| BP3 <sup>a</sup>    | 9.81 (7.96, 12.08)<br>[408]              | 4.59 (2.96, 7.12)<br>[91]                   | 7.06 (5.01, 9.96)<br>[143]                  | 27.75 (18.23, 42.22)<br>[99]                | 11.68 (7.69, 17.73)<br>[75]             |
| BP8 <sup>a</sup>    | 0.24 (0.19, 0.31)<br>[396]               | 0.16 (0.09, 0.27)<br>[88]                   | 0.16 (0.10, 0.25)<br>[137]                  | 0.58 (0.33, 1.03)<br>[98]                   | 0.28 (0.16, 0.48)<br>[73]               |
| 4OH-BP <sup>b</sup> | 0.21 (0.19, 0.24)<br>[411]               | 0.17 (0.13, 0.22)<br>[92]                   | 0.18 (0.16, 0.22)<br>[143]                  | 0.28 (0.22, 0.36)<br>[100]                  | 0.25 (0.19, 0.32)<br>[76]               |

NOTE: All chemical are creatinine-adjusted. Valid n's are listed in brackets. CI, denotes confidence interval; LIFE, denotes Longitudinal Investigation of Fertility and the Environment Study; LOD, denotes limits of detection; uv, denotes ultra violet

2,4-OH-BP; 2,4-dihydroxybenzophenone or BP-1

2,2',4,4'-OH-BP; 2,2',4,4'-tetrahydroxybenzophenone or BP-2

2OH-4-MeO-BP; 2-hydroxy-4-methoxybenzophenone or BP-3

2,2'-OH-4MeO-BP; 2,2'-dihydroxy-4-methoxybenzophenone or BP-8

4OH-BP; 4-hydroxybenzophenone

<sup>a</sup>  $P < 0.001$ ; Wilcoxon test when testing each chemical separately.

<sup>b</sup>  $P < 0.02$ ; Wilcoxon test when testing each chemical separately.

**Web Table 4.** Geographic Mean Comparison of Male Partners' Benzophenone-Type UV Filter Concentrations by Season, LIFE Study, 2005-2009.

| UV Filter           | Total Geometric Mean (95% CI) | Winter Geometric Mean (95% CI) | Spring Geometric Mean (95% CI) | Summer Geometric Mean (95% CI) | Fall Geometric Mean (95% CI) |
|---------------------|-------------------------------|--------------------------------|--------------------------------|--------------------------------|------------------------------|
| BP-1 <sup>a</sup>   | 1.71 (1.38, 2.10)<br>[394]    | 0.60 (0.42, 0.85)<br>[87]      | 1.52 (1.07, 2.15)<br>[134]     | 4.98 (3.29, 7.54)<br>[99]      | 1.72 (1.06, 2.79)<br>[74]    |
| BP-2 <sup>b</sup>   | 0.05 (0.04, 0.06)<br>[379]    | 0.05 (0.04, 0.07)<br>[86]      | 0.04 (0.03, 0.05)<br>[130]     | 0.07 (0.05, 0.09)<br>[95]      | 0.04 (0.03, 0.06)<br>[68]    |
| BP-3 <sup>a</sup>   | 3.97 (3.24, 4.87)<br>[387]    | 1.55 (1.09, 2.21)<br>[86]      | 3.52 (2.52, 4.91)<br>[132]     | 10.53 (6.77, 16.37)<br>[96]    | 4.14 (2.65, 6.47)<br>[73]    |
| BP-8 <sup>b</sup>   | 0.12 (0.09, 0.15)<br>[378]    | 0.07 (0.04, 0.12)<br>[85]      | 0.11 (0.07, 0.17)<br>[128]     | 0.26 (0.14, 0.47)<br>[96]      | 0.09 (0.06, 0.15)<br>[69]    |
| 4OH-BP <sup>a</sup> | 0.13 (0.11, 0.14)<br>[396]    | 0.10 (0.08, 0.12)<br>[88]      | 0.11 (0.09, 0.13)<br>[134]     | 0.20 (0.16, 0.26)<br>[99]      | 0.12 (0.09, 0.14)<br>[75]    |

NOTE: All chemical are creatinine-adjusted. Valid n's are listed in brackets.

CI, denotes confidence interval; LIFE, denotes Longitudinal Investigation of Fertility and the Environment Study; LOD, denotes limits of detection; uv, denotes ultra violet

2,4-OH-BP; 2,4-dihydroxybenzophenone or BP-1

2,2',4,4'-OH-BP; 2,2',4,4'-tetrahydroxybenzophenone or BP-2

2OH-4-MeO-BP; 2-hydroxy-4-methoxybenzophenone or BP-3

2,2'-OH-4MeO-BP; 2,2'-dihydroxy-4-methoxybenzophenone or BP-8

4OH-BP; 4-hydroxybenzophenone

<sup>a</sup>P < 0.0001; Wilcoxon test when testing each chemical separately.

<sup>b</sup>P < 0.01; Wilcoxon test when testing each chemical separately.

**Web Table 5.** Correlation Matrix for Partners' Urinary Benzophenone Concentrations, LIFE Study, 2005-2009.

|       |        | Females |       |      |                   |                   |
|-------|--------|---------|-------|------|-------------------|-------------------|
|       |        | BP-1    | BP-2  | BP-3 | BP-8              | 4OH-BP            |
| Males | BP-1   | 0.08    | -0.02 | 0.04 | 0.06              | 0.00              |
|       | BP-2   | 0.00    | -0.02 | 0.03 | -0.03             | -0.01             |
|       | BP-3   | 0.05    | -0.01 | 0.03 | 0.03              | 0.00              |
|       | BP-8   | 0.03    | -0.02 | 0.00 | 0.08              | 0.00              |
|       | 4OH-BP | 0.10    | 0.03  | 0.04 | 0.10 <sup>a</sup> | 0.19 <sup>a</sup> |

LIFE, denotes Longitudinal Investigation of Fertility and the Environment Study

2,4-OH-BP; 2,4-dihydroxybenzophenone or BP-1

2,2',4,4'-OH-BP; 2,2',4,4'-tetrahydroxybenzophenone or BP-2

2OH-4-MeO-BP; 2-hydroxy-4-methoxybenzophenone or BP-3

2,2'OH-4MeO-BP; 2,2'-dihydroxy-4-methoxybenzophenone or BP-8

4OH-BP; 4-hydroxybenzophenone

<sup>a</sup>  $P < 0.05$ ; T-test based on the Pearson correlation coefficient.
